# Supplementary material
Source: PubMed Central journal article supplement (PMC1166590)

**A**  
TTX

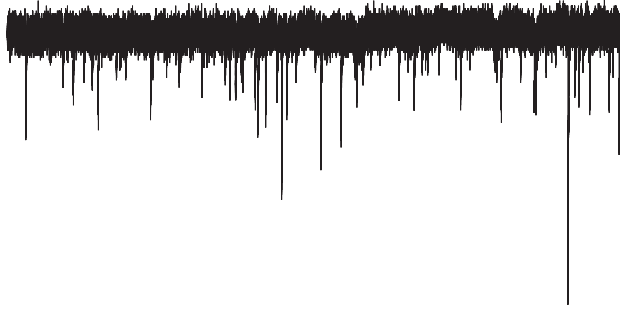

TTX + SR141716A

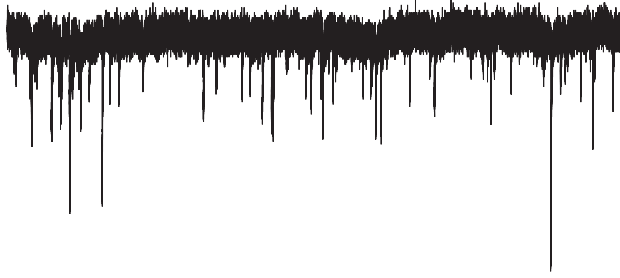

10 pA  
5 sec

**C**  
TTX

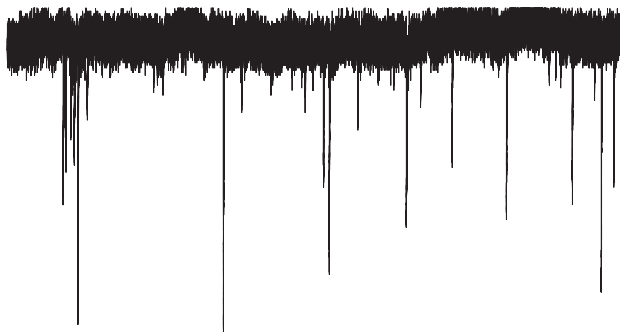

TTX + WIN55212-2

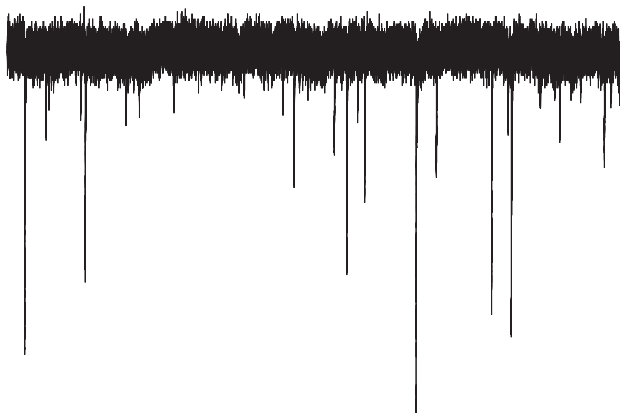

**B**

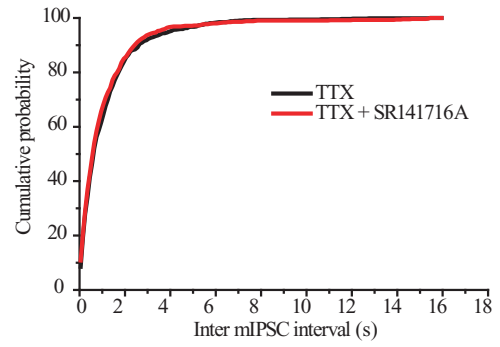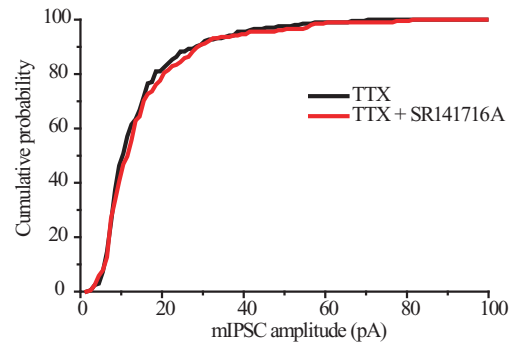

**D**

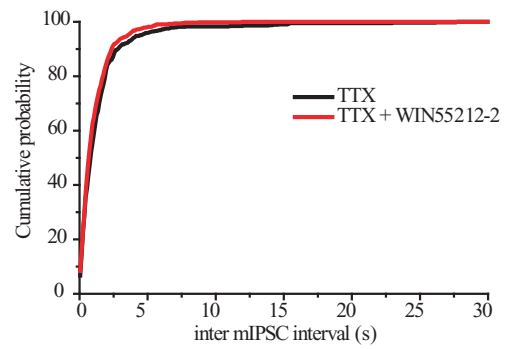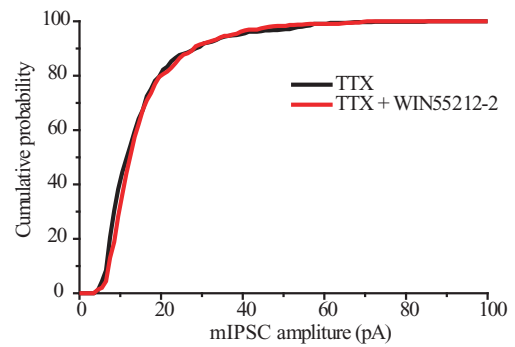

Supplement: pnas_0409641102_1.pdf [file pnas_0409641102_1.pdf]
